# Supplementary material for: FeNi intermetallic compound nanoparticles wrapped with N-doped graphitized carbon: a novel cocatalyst for boosting photocatalytic hydrogen evolution
Source: Royal Society of Chemistry journal article supplement (doi:10.1039/c9ta12915d), 2020-01-01
Supplement: c9ta12915d1.pdf [file c9ta12915d1.pdf]

## Supplementary Information

### **Title: FeNi Intermetallic Compound Nanoparticles Wrapped by N-doped Graphitized Carbon: A novel Cocatalyst for Boosting PC Hydrogen Evolution**

Sibo Chen,<sup>a</sup> Xunfu Zhou,<sup>a</sup> Jihai Liao,<sup>b</sup> Siyuan Yang,<sup>a</sup> Xiaosong Zhou,<sup>c</sup> Qiongzhi Gao,<sup>a</sup> Shanqing Zhang,<sup>\*d</sup> Yueping Fang,<sup>\*a, e</sup> Xinhua Zhong<sup>a, e</sup> and Shengsen Zhang<sup>\*a, e</sup>

<sup>a</sup> College of Materials and Energy, South China Agricultural University, Guangzhou, 510642, PR China.

\*E-mail: zhangss@scau.edu.cn; ypfang@scau.edu.cn

<sup>b</sup> Department of Physics, South China University of Technology, Guangzhou 510640, P. R. China.

<sup>c</sup> School of Chemistry and Chemical Engineering, Institute of Physical Chemistry, Lingnan Normal University, Zhanjiang, 524048, China.

<sup>d</sup> Centre for Clean Environment and Energy and School of Environment and Science, Griffith University, Gold Coast, QLD 4222, Australia.

\*E-mail: s.zhang@griffith.edu.au

<sup>e</sup> Guangdong Laboratory for Lingnan Modern Agriculture, Guangzhou, 510643, China

## **Contents**

**Part I: Density functional theory calculations**

**Part II: Experimental Section**

**Part III: Supplementary Results**

**Part IV: References**

## Part I: Density functional theory calculations

Our calculations were performed based on the density functional theory (DFT) applied in the Vienna Ab initio Simulation Package (VASP).<sup>1</sup> Projector augmented wave (PAW) potentials<sup>2</sup> with Spin-polarized generalized gradient approximation (GGA) in Perdew-Burke-Ernzerhof (PBE)<sup>3</sup> format was used for the exchange-correlation potential. The plane-wave cutoff energy was set at 450 eV. Ni(111) and FeNi(111) surfaces were modeled by a four-layer periodic slab with a vacuum thickness of 15 Å. The upper two layers and the adsorbates were allowed to relax until all residual forces declined below 0.01 eV/Å, while the bottom two layers were fixed. The reciprocal space is represented by the Monkhorst-Pack special k point scheme<sup>4</sup> with a density of grid points along with x and y directions about  $2\pi \times 0.02 \text{ Å}^{-1}$ .

The adsorption energies ( $E_{ads}$ ) of a H<sub>2</sub> atom on substrates were calculated as follows.

$$E_{ads} = E_0 - \frac{1}{2}E_{H_2} - E_s$$

Where  $E_0$  and  $E_s$  represent the total energies per cell with and without adsorbed H atom and  $E_{H_2}$  indicates the total energy of an H<sub>2</sub> molecule.<sup>5, 6</sup>

## Part II: Experimental Section

### 2.1 Chemical reagents

Potassium ferricyanide ( $K_3[Fe(CN)_6]$ ), sodium citrate ( $C_6H_5Na_3O_7$ ), nickel nitrate hexahydrate ( $Ni(NO_3)_2 \cdot 6H_2O$ ), and ferric ferrocyanide ( $Fe_4[Fe(CN)_6]_3$ ) were sourced from Aladdin.  $TiO_2$  was purchased from Degussa and urea (AR) was bought from Damao. All the involved chemical reagents were used as purchased and not further purified.

### 2.2 Synthesis process

#### ***Preparation of $Ni_3[Fe(CN)_6]_2 \cdot H_2O$ nanocubes and FeNi@NGC nanoparticles.***

$Ni_3[Fe(CN)_6]_2 \cdot H_2O$  nanocubes were prepared in line with the method described in the literature.<sup>7</sup> In a typical synthesis, a 200 ml solution of  $Ni(NO_3)_2 \cdot 6H_2O$  (6 mmol) and sodium citrate (9 mmol) was mixed with 200 ml  $K_3Fe(CN)_6$  (4 mmol) solution. The mixed solution was agitated for 5 min then aged for 24 h. Then, the resulting precipitates were separated by centrifugation, washed and dried in vacuum at 60 °C (Figure S1, Supporting Information). The FeNi@NGC nanoparticles were fabricated by the pyrolysis of  $Ni_3[Fe(CN)_6]_2 \cdot H_2O$ , which is described in Figure S1c by thermogravimetric analysis (TGA). In a typical process, after grinding, 1.0 g  $Ni_3[Fe(CN)_6]_2 \cdot H_2O$  powder was transferred into a porcelain boat and annealed in  $N_2$  at 650 °C for 2 h. The resulting black solid powder was FeNi@NGC nanoparticles.

***Preparation of Fe@NGC and Ni@NGC nanoparticles.*** In the case of  $N_2$  as a protective gas, 1 g of  $Fe_4[Fe(CN)_6]_3$  was calcined at 900 °C for 2 h to obtain Fe@NGC nanoparticles. 0.2 g of  $Ni(NO_3)_2 \cdot 6H_2O$  and 1 g of g- $C_3N_4$  were stirred and dried in

ethanol solution before being calcined at 800 °C for 2 h to derive Ni@NGC nanoparticles.

**Preparation of g-C<sub>3</sub>N<sub>4</sub>.** Typically, 20 g of urea was placed in a porcelain crucible with a cover and then calcined at 600 °C for 2 h in a muffle furnace with a heating rate of 5 °C min<sup>-1</sup>. The pristine g-C<sub>3</sub>N<sub>4</sub> was obtained after cooling to room temperature.

**Preparation of FeNi@NGC/g-C<sub>3</sub>N<sub>4</sub>, Fe@NGC/g-C<sub>3</sub>N<sub>4</sub>, and Ni@NGC/g-C<sub>3</sub>N<sub>4</sub>.** By mechanically grinding a mixture of g-C<sub>3</sub>N<sub>4</sub> and FeNi@NGC with varying FeNi@NGC content at mass ratios of 5%, 10%, 15%, and 20%. After grinding for 1 h, the obtained samples were labeled as FNC5, FNC10, FNC15, and FNC20, respectively. The Fe@NGC/g-C<sub>3</sub>N<sub>4</sub> and Ni@NGC/g-C<sub>3</sub>N<sub>4</sub> photocatalysts were obtained using an identical method.

**Preparation of hollow carbon spheres-modified g-C<sub>3</sub>N<sub>4</sub>.** The FeNi@NGC nanoparticles were dispersed in HCl solution (1M) and then stirred for 6 h. After centrifugal drying, the hollow carbon spheres (HCS) were derived (Figure S3a, Supporting Information). Subsequently, the same mechanical grinding method was used for the preparation of HCS/g-C<sub>3</sub>N<sub>4</sub>.

**Preparation of FeNi@NGC/TiO<sub>2</sub>.** Typically, 0.08 g of FeNi@NGC nanoparticles and 2 g of TiO<sub>2</sub> were added into 40 ml ethanol and dried by stirring at 60 °C. The photocatalysts obtained by calcining at 300 °C for 2 h under N<sub>2</sub> were recorded as 4%-FN/TiO<sub>2</sub>. The 2%-FN/TiO<sub>2</sub> and 6%-FN/TiO<sub>2</sub> samples were obtained in the same way.

**Preparation of 1.0%Pt/g-C<sub>3</sub>N<sub>4</sub> and 1.0%Pt/TiO<sub>2</sub> photocatalyst.** 1.0 wt.% Pt was loaded on the surface of g-C<sub>3</sub>N<sub>4</sub> and TiO<sub>2</sub> photocatalysts by in situ photo-deposition method

using  $\text{H}_2\text{PtCl}_6$  to prepare the 1.0%Pt/g- $\text{C}_3\text{N}_4$  and 1.0%Pt/ $\text{TiO}_2$  photocatalyst, respectively.<sup>8</sup>

**Preparation of N-doped carbon (NC) coated FeCo IMC (FeCo@NC), Fe@NC and Ni@NC.** 1.0 g of  $\text{Na}_2\text{CoFe}(\text{CN})_6$  nanocubes were placed in porcelain boat and calcined at 500 °C for 4 h under  $\text{N}_2$  protection with a heating rate of 5 °C min<sup>-1</sup>, and a black solid powder, i.e., FeCo@NC nanoparticles, was obtained.  $\text{Co}(\text{NO}_3)_2 \cdot 6\text{H}_2\text{O}$  and g- $\text{C}_3\text{N}_4$  were added into anhydrous ethanol and stirred evenly, then dried at 60 °C and calcined at 800 °C for 2 h to obtain Co@NC nanoparticles. Similarly, Fe@NC nanoparticles were obtained from  $\text{FeCl}_3$  and g- $\text{C}_3\text{N}_4$  as raw materials calcining at 900 °C for 2 h. Preparation of FeCo@NC/g- $\text{C}_3\text{N}_4$  composite photocatalyst was done by mechanical grinding of g- $\text{C}_3\text{N}_4$  and FeCo nanoparticles in agate mortar.

**Preparation of FeCo@NC/g- $\text{C}_3\text{N}_4$ , Fe@NC/g- $\text{C}_3\text{N}_4$  and Co@NC/g- $\text{C}_3\text{N}_4$ .** Preparation of the FeCo@NC/g- $\text{C}_3\text{N}_4$  composite photocatalyst was done by mechanical grinding of g- $\text{C}_3\text{N}_4$  (90%) and FeCo nanoparticles (10%) for 1h in agate mortar. The Co@NC/g- $\text{C}_3\text{N}_4$  and Fe@NC/g- $\text{C}_3\text{N}_4$  composite photocatalysts were produced in the same way.

## 2.3 Characterization

The X-ray diffraction (XRD) spectra were recorded using Rigaku D/MAX 2500 v/PC at 5 °C min<sup>-1</sup>. The morphology and distribution of material were examined by using field emission scanning electron microscope (FESEM) and transmission electron microscope (TEM), both of which were purchased from Philips FEI Quanta. X-ray photoelectron spectroscopy (XPS) records were obtained with ESCALB 250

equipment. N<sub>2</sub> adsorption and desorption curve as well as pore size distribution information were obtained by Mc ASAP2460. The photoluminescence (PL) spectra were obtained on a Perkin-Elmer LS-50 B fluorescence spectrometer (Perkin Elmer, Inc., USA) with an excitation wavelength of 379 nm and the PL decay plots were detected using an Edinburgh Instruments F980 at room temperature. The mass ratios of Fe and Ni in FeNi@NGC were detected by inductively coupled plasma atomic emission spectroscopy (ICP-AES) analysis using a PerkinElmer Plasma 400 spectrophotometer. EIS was examined at a 5 mV of alternating current signal in the frequency range of 0.01e106 Hz on a PGSTAT30 Eco Chemie B. V. electrochemical workstation.

## **2.4 Photoelectrochemical measurements**

10 mg of photocatalysts and 10 µl 0.5% Nafion solution were added into 5 ml ethanol before dispersion by ultrasound. The solution of 500 µl was deposited on FTO conductive glass (2 cm × 3 cm) 10 times in total. The FTO glass deposited with photocatalyst was calcined at 150 °C for 1 hour by using nitrogen as the protective gas, after which the working electrode was prepared. The calcined FTO glass, the platinum plate, and the Ag/AgCl (saturated KCl) were taken as the working, the counter, and the reference electrodes, respectively, to form a three-electrode system. Mott-Schottky, electrocatalytic H<sub>2</sub> evolution, electrochemical impedance spectroscopy, and transient photocurrent were measured at an electrochemical workstation (Zahner-Elektrik IM6E35). Linear sweep voltammetry (LSV) at a 5 mV s<sup>-1</sup> scan rate was performed by an electrochemical analyzer with a three-electrode

system in an electrolyte solution of 0.5 M Na<sub>2</sub>SO<sub>4</sub>. Rotating disk electrode (RDE) or rotating ring-disk electrode (RRDE) testing was performed using a Pine Modulated Speed rotator with the GC disk diameter of 5 mm and the Pt ring width of 1 mm. LSV were carried out on RDE or RRDE (15.5  $\mu$ L catalyst ink, catalyst loading 0.261 mg cm<sup>-2</sup>) in the oxygen saturated 0.1 M KOH solution from 0.0 V to 1.0 V (vs. RHE) with rotation speeds of 1600 rpm at a scan rate of 10 mV s<sup>-1</sup>.

## **2.5 Photocatalytic (PC) H<sub>2</sub> evolution measurements**

In a traditional PC H<sub>2</sub> evolution experiment, 20 mg of the photocatalysts was dispersed in 15% triethanolamine aqueous solution (15ml/100 ml) and 100 ml solution was transferred to a sealed quartz magnetic top irradiation reactor. A 300 W Xenon lamp was taken as the light source, and the visible light was obtained by an optical filter to cut off the light in the ultraviolet region in the g-C<sub>3</sub>N<sub>4</sub>-based photocatalyst systems. The TiO<sub>2</sub>-based photocatalyst process for H<sub>2</sub> evolution uses ultraviolet-visible light as the light source. N<sub>2</sub> bubbles in the reactor for over 30 min to create an anaerobic environment in the reactor before illumination. After the reaction started, 400  $\mu$ L gas was extracted from the reactor every hour and analyzed using gas chromatography (GC-7900) to calculate the efficiency of the PC H<sub>2</sub> evolution. PC H<sub>2</sub> generation for overall pure water splitting was carried out in a LabSolar 6A PC H<sub>2</sub> evolution system (Perfectlight, Beijing) under white light (300 W Xe arc lamp) irradiation.

## **2.6 Calculation of apparent quantum yield**

In a typical formula for calculating the apparent quantum yield (AQY) of photocatalyst, the lights of different wavelength range were obtained by using the Xenon lamp as

the light source with different optical filter. The light intensity was measured by UV spectrum analyzer (OHSP-350UV, Hangzhou HOPOO, wavelength range within 340–780 nm).  $R_{H_2}$  ( $\mu\text{mol/h}$ ) represents  $H_2$  evolution rate,  $E$  ( $\text{W/cm}^2$ ) represents monochromatic light intensity,  $A$  ( $\text{cm}^2$ ) represents the light radiation area of the reaction system,  $\lambda$  (m) represents monochromatic wavelength,  $t_1$  (h),  $t_2$  (s),  $h$  (W) and  $c$  (m/s) substituted into 1, 3600,  $6.626 \times 10^{-34}$  and  $3 \times 10^8$ , respectively<sup>9</sup>.

$$AQY (\%) = \frac{\text{number of reached electrons}}{\text{number of incident photons}} \times 100$$

$$= \frac{\text{number of evolved } H_2 \text{ molecules} \times 2}{\text{number of incident photons}} \times 100$$

$$= \frac{2R_{H_2}t_1N_A}{EA t_2 \lambda / hc} = 6.6482 \times 10^{-5} \times R_{H_2} / (E \times A \times \lambda)$$

### Part III: Supplementary Results

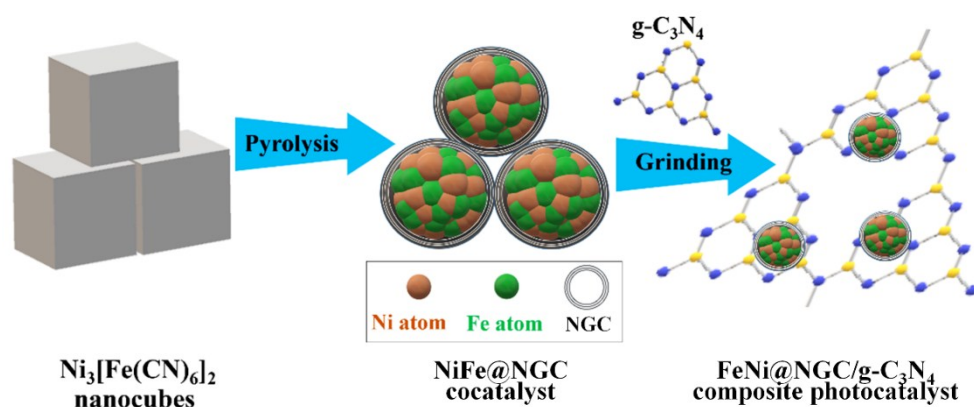

**Scheme S1.** Schematic illustration of the syntheses of  $\text{FeNi@NGC}$  cocatalyst and  $\text{FeNi@NGC/g-C}_3\text{N}_4$  composite photocatalyst for the application of highly enhanced PC  $\text{H}_2$  generation.

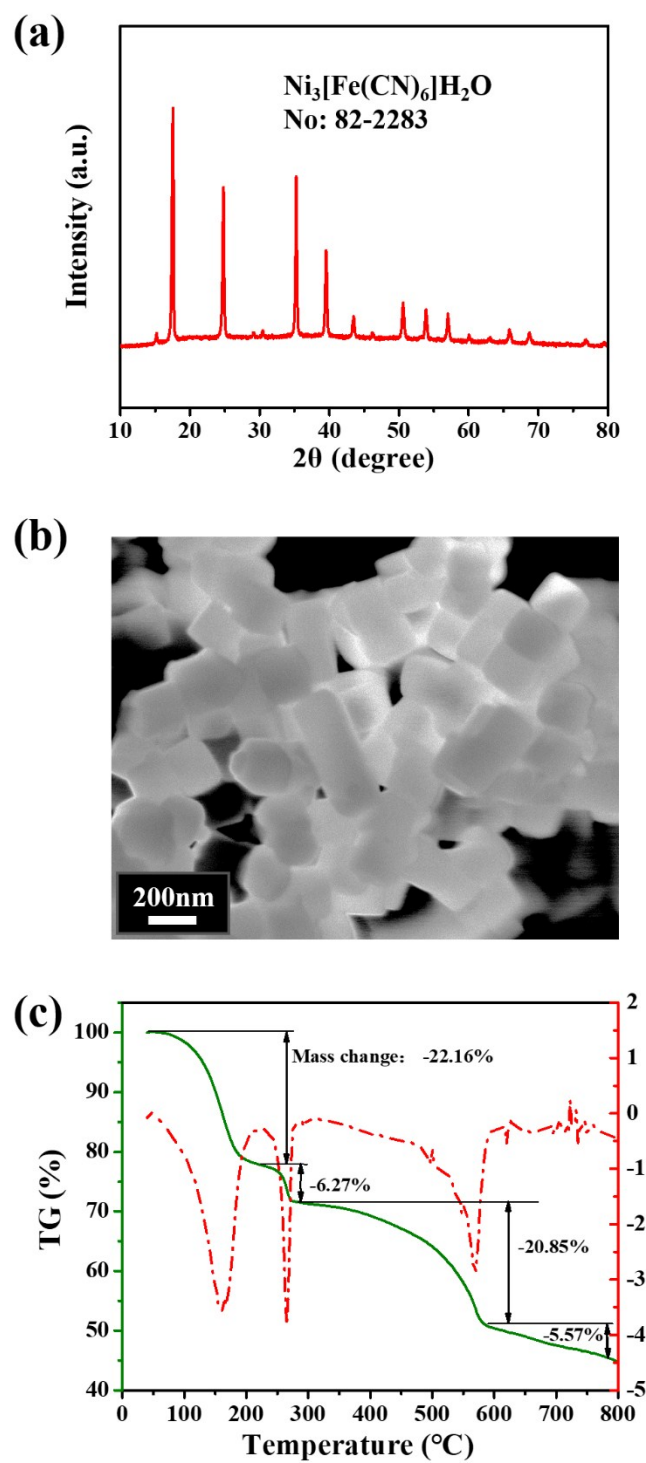

**Figure S1.** XRD pattern (a), SEM image (b) and TG analysis (c) for  $\text{Ni}_3[\text{Fe}(\text{CN})_6]_2$ .

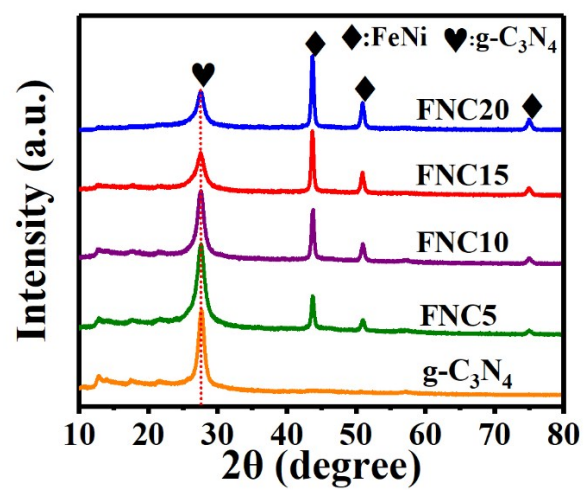

**Figure S2.** XRD patterns of g-C<sub>3</sub>N<sub>4</sub> and FNC samples.

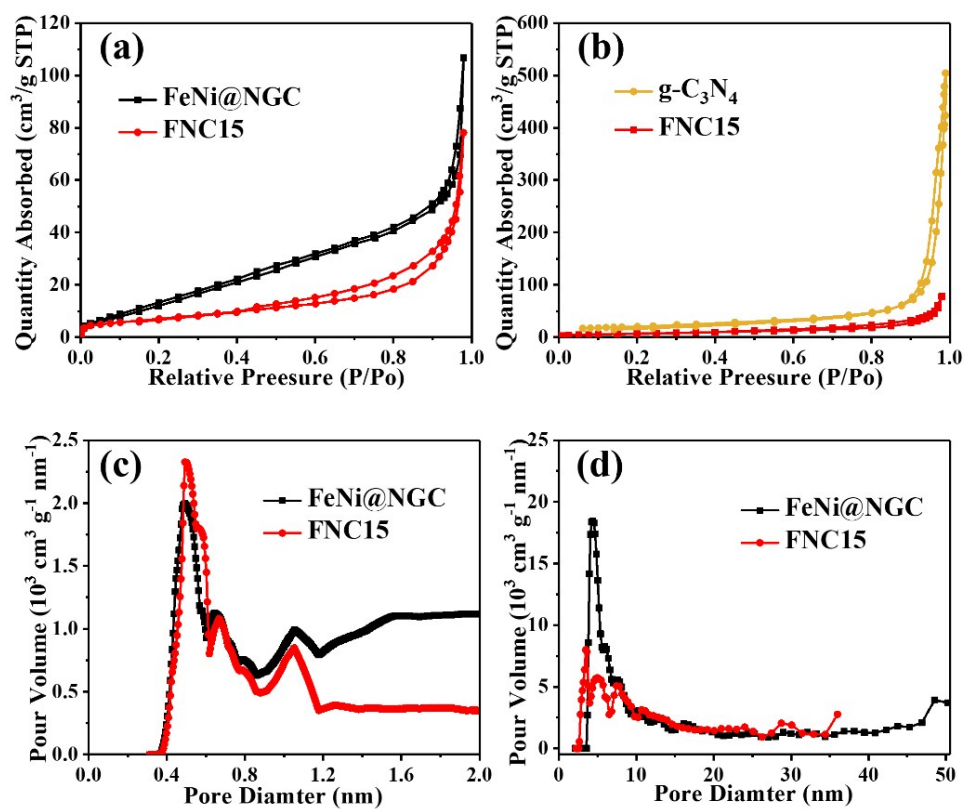

**Figure S3.** Adsorption-desorption curve of FeNi@NGC and FNC15 (a),  $\text{g-C}_3\text{N}_4$  and FNC15 (b). Pore size distribution of FeNi@NGC and FNC15 (c, d).

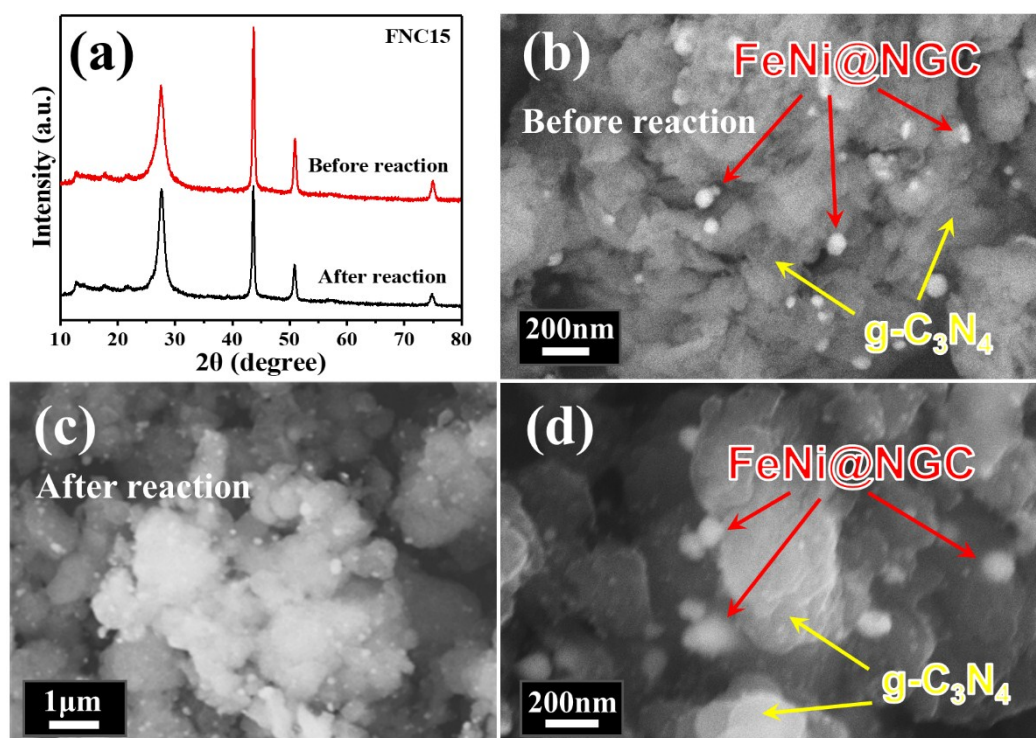

**Figure S4.** (a) XRD pattern of FNC15 before and after reaction, SEM of FNC15 before reaction (b) and after reaction (c and d).

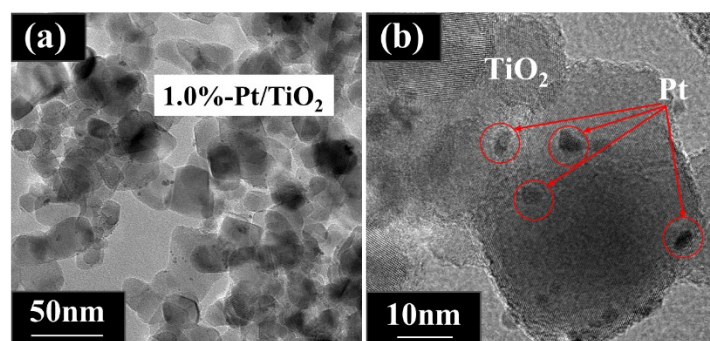

**Figure S5.** TEM (a) and HRTEM (b) images of 1.0%-Pt/TiO<sub>2</sub>.

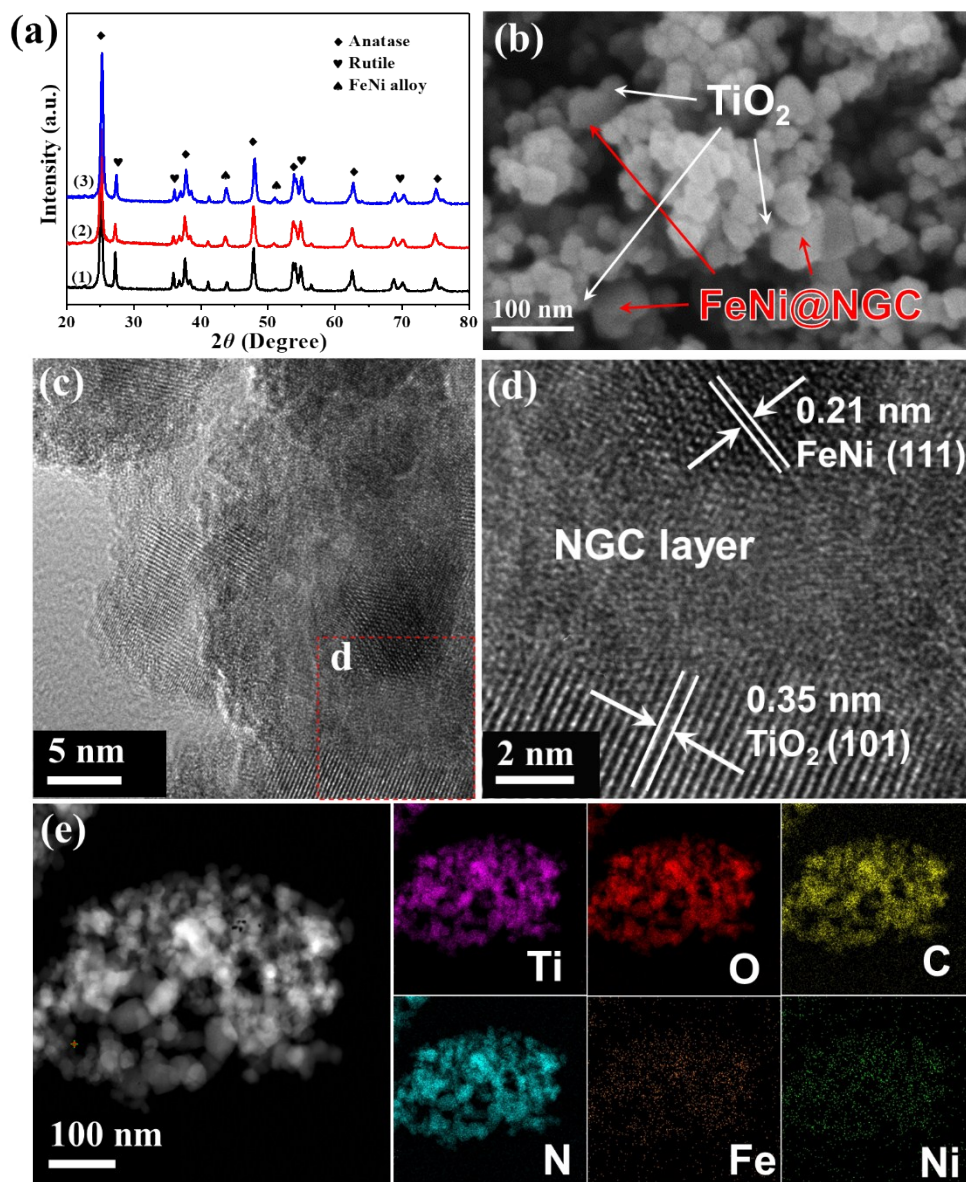

**Figure S6.** (a) XRD pattern of 2%-FN-TiO<sub>2</sub> (1), 4%-FN-TiO<sub>2</sub> (2) and 6%-FN-TiO<sub>2</sub> (3). (b) SEM image of 4%-FN-TiO<sub>2</sub> sample. TEM (c) and HRTEM (d) images and corresponding EDX elements analysis (e) of 4%-FN-TiO<sub>2</sub>.

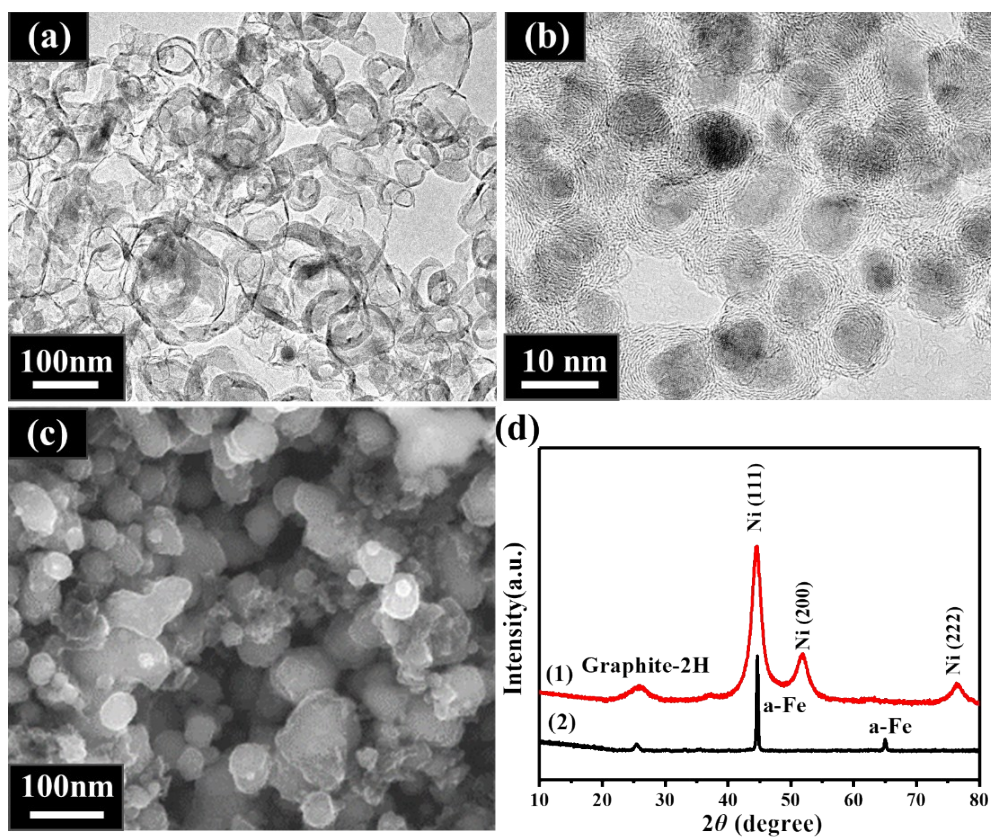

**Figure S7.** TEM images of HCS (a) and Ni@NGC (b); (c) SEM image of Fe@NGC; (d) XRD spectra of Ni@NGC (1) and Fe@NGC (2).

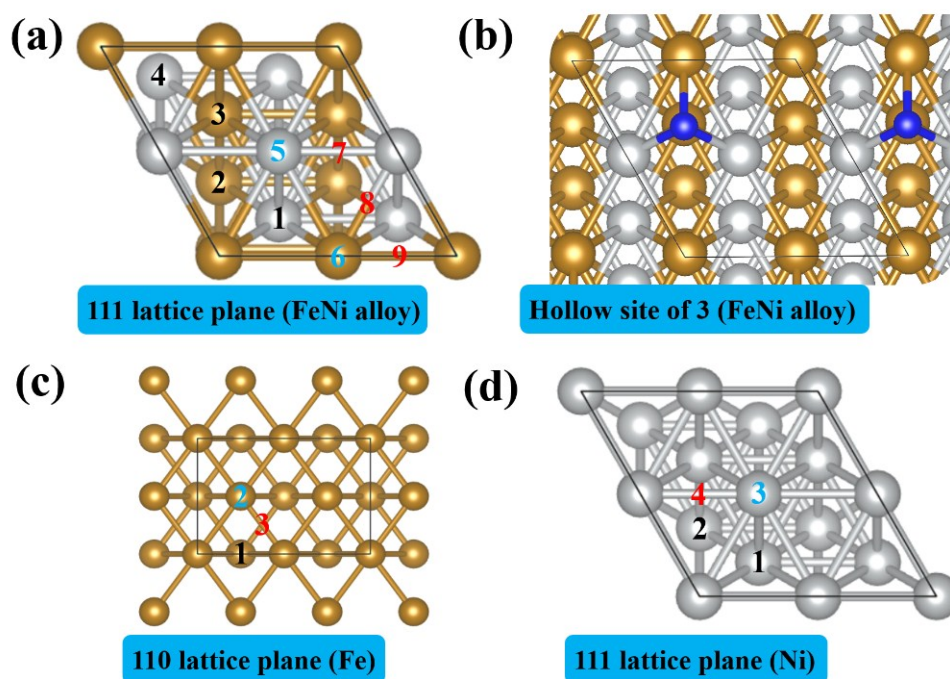

**Figure S8.** The (111) surface model of FeNi (a), H adsorption on the FeNi (111) surface (b), the 110 surface model of Fe (c), and the 111 surface model of Ni (d).

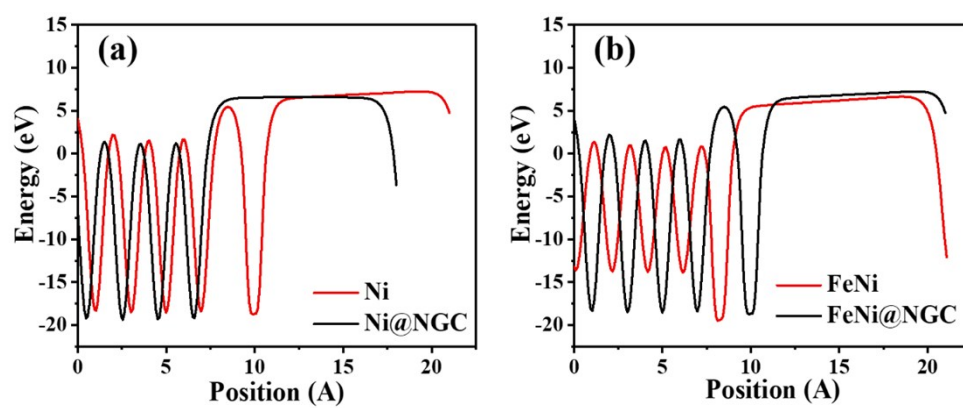

**Figure S9.** The vacuum level of Ni, Ni@NGC, FeNi and FeNi@NGC

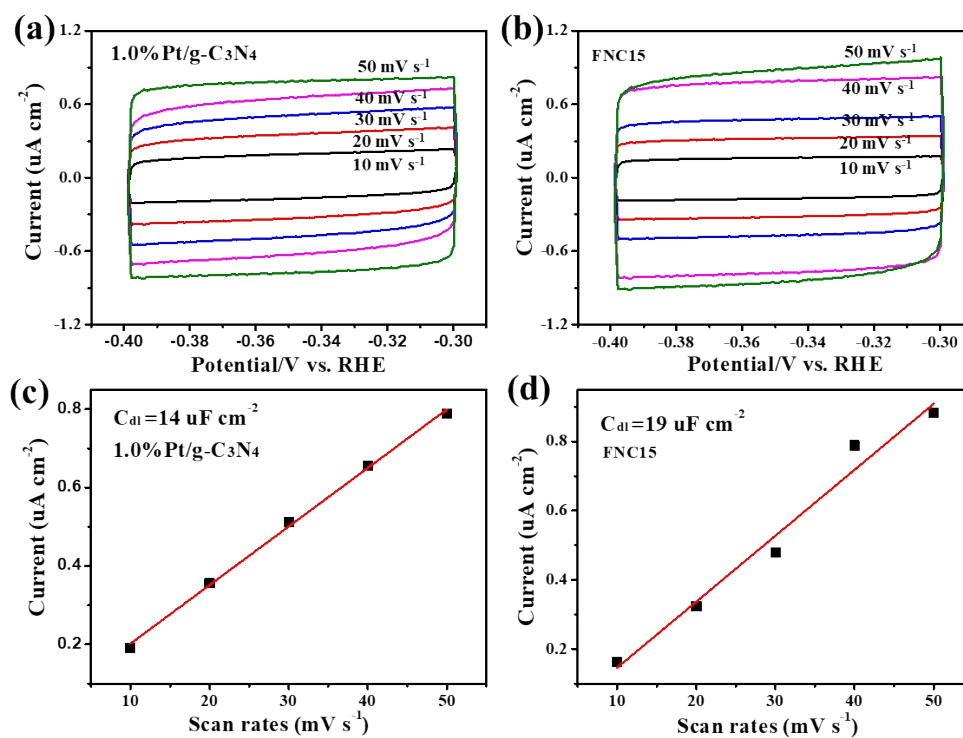

**Figure S10.** CV cures of 1.0%Pt/g-C<sub>3</sub>N<sub>4</sub> (a) and FNC15 (b) samples under various scan rates from 10 to 50 mV s<sup>-1</sup> in the non-Faradaic potential range (-0.4 ~ 0.3 eV vs. RHE); The corresponding C<sub>dl</sub> plot of 1.0%Pt/g-C<sub>3</sub>N<sub>4</sub> (c) and FNC15 (d) samples derived from current densities at -0.35 V vs RHE (in a and b) against the scan rates.

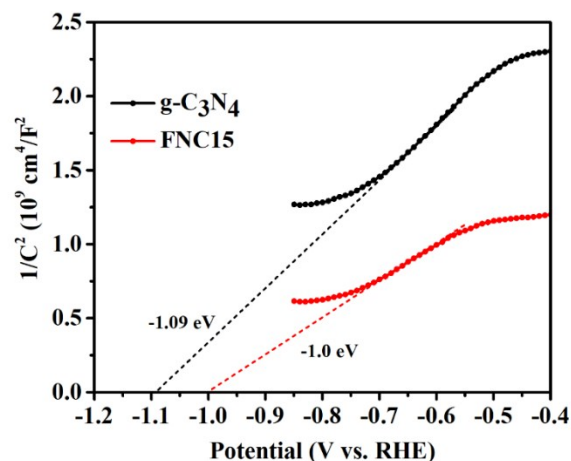

**Figure S11.** Mott–Schottky curves of g-C<sub>3</sub>N<sub>4</sub> and FNC15 composite photocatalyst.

As shown in Figure S10, the positive tangent slopes of linear  $C^{-2}/E$  indicate that both the g-C<sub>3</sub>N<sub>4</sub> and FNC15 photocatalysts belong to n-type semiconductors.<sup>10</sup> The calculated flat-band potentials ( $V_{fb}$ ) for g-C<sub>3</sub>N<sub>4</sub> and FNC15 are  $-1.09$  and  $-1.0$  V (vs. RHE), respectively. It is known that the bottom of conduction bands (CB) is negative by  $-0.2$  V than  $V_{fb}$  for many n-type semiconductors.<sup>11, 12</sup> Thereby, conduction band (CB) potentials of g-C<sub>3</sub>N<sub>4</sub> and FNC15 are  $-1.29$  and  $-1.20$  eV (vs. RHE), respectively. From the  $V_{fb}$  and the bandgaps calculated from the Tauc's plots (Figure 6b), valence band (VB) potentials of g-C<sub>3</sub>N<sub>4</sub> and FNC15 are  $1.41$ , and  $1.50$  eV (vs. RHE), respectively.

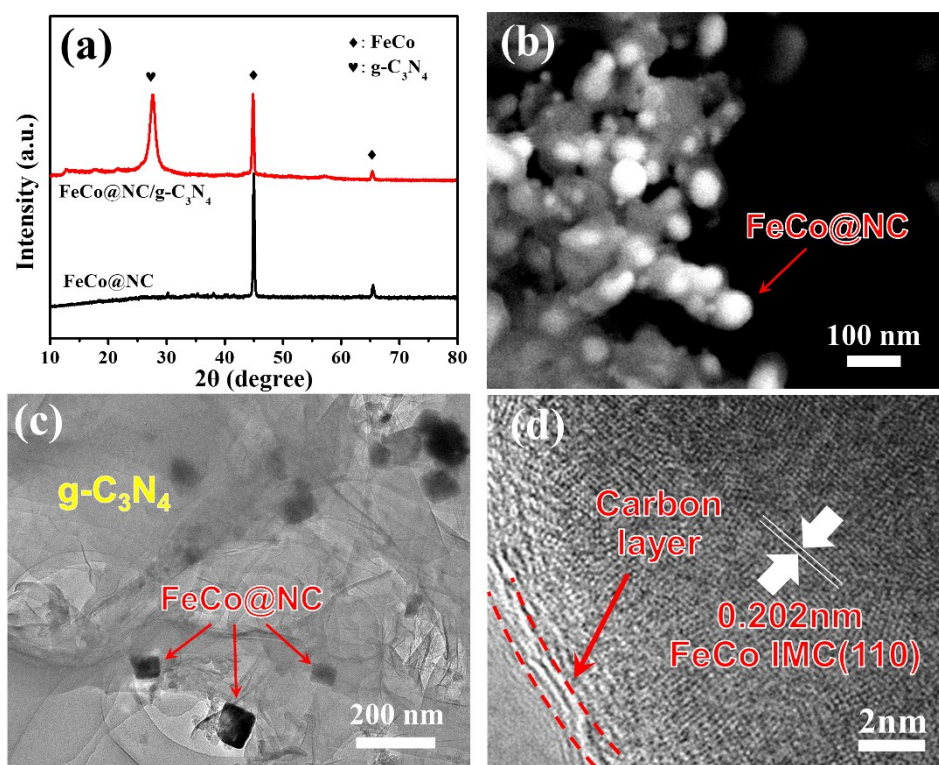

**Figure S12.** XRD patterns of  $g\text{-C}_3\text{N}_4$  and  $\text{FeCo@NC/g-C}_3\text{N}_4$  samples (a), SEM image of  $\text{FeCo@NC}$  (b), TEM image of  $\text{FeCo@NC/g-C}_3\text{N}_4$  (c), HRTEM image of  $\text{FeCo@C}$  in  $\text{FeCo@NC/g-C}_3\text{N}_4$  (d).

Figure S11a displays XRD diffraction peaks of  $\text{FeCo@NC}$  and  $\text{FeCo@NC/g-C}_3\text{N}_4$ . The main diffraction peak at  $45^\circ$  is reflected by the most exposed surface of (110) plane of FeCo alloy. The secondary peak at  $65.5^\circ$  is reflected by the (200) crystal plane (PDF#49-1567). XRD patterns for the  $\text{FeCo@NC/g-C}_3\text{N}_4$  composite photocatalysts match well with that of FeCo IMC and  $g\text{-C}_3\text{N}_4$ . As shown in Figure S10b, the diameter of the  $\text{FeCo@NC}$  nanoparticles is within 50 nm and a carbon coating can be observed on the surface of the nanoparticles. The uniform distribution of  $\text{FeCo@NC}$  nanoparticles in  $g\text{-C}_3\text{N}_4$  nanoparticles can be observed in Figure S10c. According to the lattice stripes of FeCo alloy in the HRTEM diagram of Figure S10d, the lattice width of 0.2 nm is

considered to be caused by the (110) surface of FeCo. Figure S10d also reveals the carbon layer on the surface of the FeCo@NC nanoparticles is tightly bound to g-C<sub>3</sub>N<sub>4</sub>. These results indicate that the FeCo@NC/g-C<sub>3</sub>N<sub>4</sub> nano-heterojunction has been successfully prepared.

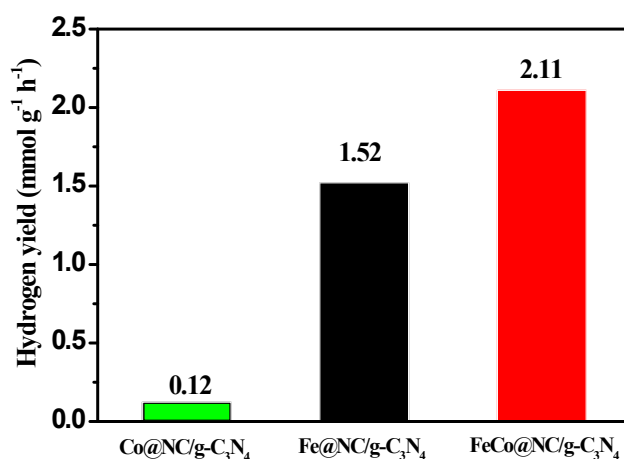

**Figure S13.** PC H<sub>2</sub> evolution rates of g-C<sub>3</sub>N<sub>4</sub> loaded with Co@NC, Fe@NC and FeCo@NC under visible light irradiation.

Figure S12 shows the best FeCo@NC/g-C<sub>3</sub>N<sub>4</sub> sample showed high PC efficiency of 2.11 mmol g<sup>-1</sup> h<sup>-1</sup> for H<sub>2</sub> evolution rate, which was about 222 times higher than that of g-C<sub>3</sub>N<sub>4</sub>. The results show that FeCo@NC nanoparticles can also be used as cocatalysts to solve the high electron-hole recombination rate of g-C<sub>3</sub>N<sub>4</sub>. Moreover, in order to further reflect the superior performance of the FeCo IMC, the best Fe@NC/g-C<sub>3</sub>N<sub>4</sub> and Co@NC/g-C<sub>3</sub>N<sub>4</sub> samples were used as the contrast group, and the PC activity was compared under the same experimental environment. The average H<sub>2</sub> evolution rates of Co@NC/g-C<sub>3</sub>N<sub>4</sub> and Fe@NC/g-C<sub>3</sub>N<sub>4</sub> were 1.52 mmol g<sup>-1</sup> h<sup>-1</sup> and 0.12 mmol g<sup>-1</sup> h<sup>-1</sup>, respectively, which were lower than those of FeCo@NC/g-C<sub>3</sub>N<sub>4</sub>.

**Table S1.** Pore structure parameters of the FeNi@NGC, FNC15 and g-C<sub>3</sub>N<sub>4</sub> samples.

| Samples                         | Specific surface         | Pore size | Cumulative pore             |
|---------------------------------|--------------------------|-----------|-----------------------------|
|                                 | area (m <sup>2</sup> /g) | (nm)      | volume (cm <sup>3</sup> /g) |
| g-C <sub>3</sub> N <sub>4</sub> | 71.7381                  | 40.5741   | 0.7815                      |
| FNC15                           | 46.451                   | 4.367     | 0.116                       |
| FeNi@NGC                        | 19.303                   | 3.468     | 0.079                       |

**Table S2.** Summary of the PC H<sub>2</sub> evolution on g-C<sub>3</sub>N<sub>4</sub>/non noble-metal photocatalysts.

| Photocatalysts                  | Cocatalysts, Mass ratio                  | Power (Xe lamp), wavelength     | Activity (μmol·h <sup>-1</sup> ), catalyst dosage | AQY                                                         | Reference (year)     |
|---------------------------------|------------------------------------------|---------------------------------|---------------------------------------------------|-------------------------------------------------------------|----------------------|
| g-C <sub>3</sub> N <sub>4</sub> | FeNi@NGC, 15 wt%                         | 300W, λ ≥ 400 nm                | 53.92 <sup>a</sup> , 3.31 <sup>b</sup> , 20 mg    | 24.49% <sup>a</sup> at 400 nm, 7.56% <sup>a</sup> at 420 nm | this work            |
| g-C <sub>3</sub> N <sub>4</sub> | Ni(OH) <sub>2</sub> , 1.0 mol%           | 350W, λ > 400 nm                | 8.2 <sup>a</sup> , 50 mg                          | 1.1% <sup>a</sup> at 420 nm                                 | <sup>13</sup> (2013) |
| g-C <sub>3</sub> N <sub>4</sub> | NiS, 1.1 wt%                             | 300W, λ ≥ 420 nm                | 48.2 <sup>a</sup> , 100 mg                        | 1.9% <sup>a</sup> at 440 nm                                 | <sup>14</sup> (2013) |
| g-C <sub>3</sub> N <sub>4</sub> | Ni/NiO, 2 wt%                            | 300W, λ ≥ 420 nm                | 10.0 <sup>a</sup> , 50 mg                         | /                                                           | <sup>15</sup> (2015) |
| g-C <sub>3</sub> N <sub>4</sub> | CoP, 1 wt%                               | 300W, λ ≥ 420 nm                | 96.20 <sup>a</sup> , 50 mg                        | 12.4% <sup>a</sup> at 420 nm                                | <sup>16</sup> (2016) |
| g-C <sub>3</sub> N <sub>4</sub> | Ni@C, 2 wt%                              | 300W, λ > 420 nm                | 64.5 <sup>a</sup> , 30 mg                         | /                                                           | <sup>17</sup> (2017) |
| g-C <sub>3</sub> N <sub>4</sub> | CoP, 0.25 wt%                            | 300W, λ > 420 nm                | 47.44 <sup>a</sup> , 100 mg                       | /                                                           | <sup>18</sup> (2017) |
| g-C <sub>3</sub> N <sub>4</sub> | NiCoP, 2 wt%                             | 300W, λ > 420 nm                | 82.15 <sup>a</sup> , 50 mg                        | 9.4% <sup>a</sup> at 420 nm                                 | <sup>19</sup> (2017) |
| g-C <sub>3</sub> N <sub>4</sub> | Ni <sub>12</sub> P <sub>5</sub> , 2 wt%  | 350W, λ > 420 nm                | 6.33 <sup>a</sup> , 50 mg                         | /                                                           | <sup>20</sup> (2017) |
| g-C <sub>3</sub> N <sub>4</sub> | Ni <sub>2</sub> P, 1 wt%                 | 300W, λ ≥ 420 nm                | 14.50 <sup>a</sup> , 40 mg                        | 1.8% <sup>a</sup> at 420 nm                                 | <sup>21</sup> (2017) |
| g-C <sub>3</sub> N <sub>4</sub> | Co, 2.63 wt%                             | 300W, AM 1.5G filter            | 11.48 <sup>a</sup> , 20 mg                        | 6.2% <sup>a</sup> at 400 nm                                 | <sup>22</sup> (2018) |
| g-C <sub>3</sub> N <sub>4</sub> | MoN, 50 wt%                              | 300W, λ > 420 nm                | 0.89 <sup>a</sup> , 5 mg                          | /                                                           | <sup>12</sup> (2018) |
| g-C <sub>3</sub> N <sub>4</sub> | Co <sub>2</sub> P, 2 wt%                 | 300W, λ > 420 nm                | 27.81 <sup>a</sup> , 50 mg                        | /                                                           | <sup>23</sup> (2018) |
| g-C <sub>3</sub> N <sub>4</sub> | Co-NG, 0.05 wt%/Pt, 3.0 wt%              | 300W, λ > 420 nm                | 160.72 <sup>a</sup> , 80 mg                       | 12.75% <sup>a</sup> at 420 nm                               | <sup>24</sup> (2018) |
| g-C <sub>3</sub> N <sub>4</sub> | CoS <sub>x</sub> , 2 wt%                 | 350W, λ ≥ 400 nm                | 31.45 <sup>a</sup> , 50 mg                        | /                                                           | <sup>25</sup> (2018) |
| g-C <sub>3</sub> N <sub>4</sub> | Co <sub>1.4</sub> Ni <sub>0.6</sub> P, / | 350W, λ > 420 nm                | 20.15 <sup>a</sup> , 50 mg                        | /                                                           | <sup>26</sup> (2019) |
| g-C <sub>3</sub> N <sub>4</sub> | MoS <sub>2</sub> , 0.75 wt%              | 300W, λ > 400 nm                | 57.75 <sup>a</sup> , 50 mg                        | 6.8% <sup>a</sup> at 420 nm                                 | <sup>27</sup> (2019) |
| g-C <sub>3</sub> N <sub>4</sub> | Co@NCNT, /                               | 300W, 148.2 mW cm <sup>-2</sup> | 24.16 <sup>a</sup> , 0.462 <sup>b</sup> , 20 mg   | 0.09% <sup>a</sup> at 420 nm                                | <sup>28</sup> (2019) |
| g-C <sub>3</sub> N <sub>4</sub> | CeO <sub>2</sub> @MoS <sub>2</sub> , /   | UV-LEDs, 3W, λ > 420 nm         | 65.4 <sup>a</sup> , 50 mg                         | 10.35% <sup>a</sup> at 420 nm                               | <sup>29</sup> (2019) |

|                          |                               |                             |                                             |                               |                      |
|--------------------------|-------------------------------|-----------------------------|---------------------------------------------|-------------------------------|----------------------|
| $g\text{-C}_3\text{N}_4$ | $\text{CoO}_x$ , 7 wt%        | 300W, $\lambda \geq 420$ nm | 10.51 <sup>a</sup> , 40 mg                  | /                             | <sup>30</sup> (2019) |
| $g\text{-C}_3\text{N}_4$ | Ag-Cu, 3 wt%                  | 300W, $\lambda \geq 420$ nm | 9.84 <sup>a</sup> , 40 mg                   | /                             | <sup>31</sup> (2018) |
| $g\text{-C}_3\text{N}_4$ | Ni, 5 wt%                     | 300W, $\lambda \geq 420$ nm | 404.6 <sup>a</sup> , 200 mg                 | 2.51% <sup>a</sup> at 420 nm  | <sup>32</sup> (2018) |
| $g\text{-C}_3\text{N}_4$ | Ni-Mo, 10 wt%                 | 300W, $\lambda \geq 420$ nm | 35.7 <sup>a</sup> , 20 mg                   | 0.05% <sup>a</sup> at 400 nm  | <sup>33</sup> (2019) |
| $g\text{-C}_3\text{N}_4$ | Fe, 0.4 atomic%               | 300W, $\lambda \geq 420$ nm | 0.007 <sup>methanol solution</sup> , 400 mg | /                             | <sup>34</sup> (2018) |
| $g\text{-C}_3\text{N}_4$ | FeCu, 10 wt%                  | 300W, $\lambda \geq 400$ nm | 14.44 <sup>a</sup> , 20 mg                  | 0.974% <sup>a</sup> at 400 nm | <sup>35</sup> (2019) |
| $g\text{-C}_3\text{N}_4$ | 2 wt % CuS                    | 350 W, $\lambda > 420$ nm   | 348 <sup>a</sup> , 50 mg                    | /                             | <sup>36</sup> (2019) |
| $g\text{-C}_3\text{N}_4$ | 15 wt % $\text{Ni}_3\text{C}$ | 350 W, $\lambda > 420$ nm   | 303.6 <sup>a</sup> , 50 mg                  | 0.40% at 420 nm               | <sup>37</sup> (2018) |
| $g\text{-C}_3\text{N}_4$ | 1 wt % $\text{Co}_2\text{P}$  | 350 W, $\lambda > 420$ nm   | 556.2 <sup>a</sup> , 50 mg                  | /                             | <sup>38</sup> (2018) |

---

[a] Sacrificial agent is TEOA, [b] Pure water.

**Table S3.** Calculation information of AQY.

| Wavelength | Light intensity        | Hydrogen evolution rate | AQY%  |
|------------|------------------------|-------------------------|-------|
| (nm)       | (mW cm <sup>-2</sup> ) | (mol s <sup>-1</sup> )  |       |
| 400        | 9.3                    | 2.20*10 <sup>-8</sup>   | 24.78 |
| 420        | 12.8                   | 8.83*10 <sup>-9</sup>   | 7.28  |
| 440        | 21.6                   | 3.52*10 <sup>-9</sup>   | 1.72  |
| 460        | 78                     | 0                       | 0     |

**Table S4.** H adsorption of Ni@NGC and FeNi@NGC in different top positions.

| Sample   | N-1  | C-1   | C-2   | C-3  | C-4   | C-5   | C-6   | C-7   |
|----------|------|-------|-------|------|-------|-------|-------|-------|
| FeNi@NGC | 0.55 | 0.39  | 0.39  | 0.21 | -0.24 | -0.35 | -0.27 | -0.35 |
| Ni@NGC   | 0.74 | -0.17 | -0.17 | 0.23 | -0.17 | -0.2  | -0.2  | -0.2  |

**Table S5.** H Adsorption of Fe, Ni and FeNi in different positions.

| Sample | 1     | 2     | 3     | 4    | 5  | 6     | 7  | 8  | 9  |
|--------|-------|-------|-------|------|----|-------|----|----|----|
| FeNi   | -0.45 | -0.59 | -0.54 | 0.34 | →1 | -0.54 | →2 | →1 | →4 |
| Fe     | -1.33 | -0.6  | 1.93  | /    | /  | /     | /  | /  | /  |
| Ni     | -0.53 | -0.54 | 0.06  | →2   | /  | /     | /  | /  | /  |

**Table S6.** Work function, vacuum level and E-fermi of Ni, FeNi, Ni@NGC and FeNi@NGC.

| Sample     | Vacuum level | E-Fermi | Work function |
|------------|--------------|---------|---------------|
| Ni         | 6.55         | 1.49    | 5.06          |
| FeNi alloy | 5.78         | 0.87    | 4.91          |
| Ni@NGC     | 7.43         | 2.54    | 4.89          |
| FeNi@NGC   | 6.75         | 1.84    | 4.91          |

**Table S7.** Fluorescence lifetime and percentage of g-C<sub>3</sub>N<sub>4</sub> and FNC15.

| Sample                          | $\tau_1(\text{ns})$ | Rel 1%  | $\tau_2(\text{ns})$ | Rel 2%  | $\tau_3(\text{ns})$ | Rel 3%   | $\tau(\text{ns})$ |
|---------------------------------|---------------------|---------|---------------------|---------|---------------------|----------|-------------------|
| g-C <sub>3</sub> N <sub>4</sub> | 80.26795            | 9.29488 | 424.3782            | 2.72204 | 10.3787             | 32.17306 | 9.31572           |
| FeC15                           | 60.20196            | 9.65174 | 70.08444            | 2.12714 | 383.2506            | 2.12664  | 4.956467          |

## Part IV: References

1. G. Kresse and J. Furthmüller, *Comp. Mater. Sci.*, 1996, **6**, 15-50.
2. P. E. Blöchl, *Phys. Rev. B*, 1994, **50**, 17953-17979.
3. J. P. Perdew, K. Burke and M. Ernzerhof, *Phys. Rev. Lett.*, 1996, **77**, 3865-3868.
4. H. J. Monkhorst and J. D. Pack, *Phys. Rev. B*, 1976, **13**, 5188-5192.
5. L. Shi, C. Ling, Y. Ouyang and J. Wang, *Nanoscale*, 2017, **9**, 533-537.
6. H. Yin, Y.-P. Qiu, H. Dai, L.-Y. Gan, H.-B. Dai and P. Wang, *J. Phys. Chem. C*, 2018, **122**, 5443-5451.
7. X. Zhang, P. Liu, Y. Sun, T. Zhan, Q. Liu, L. Tang, J. Guo and Y. Xia, *Inorg. Chem. Front.*, 2018, **5**, 1683-1689.
8. G. Zhang, Z.-A. Lan, L. Lin, S. Lin and X. Wang, *Chem. Sci.*, 2016, **7**, 3062-3066.
9. I. Tsuji, H. Kato and A. Kudo, *Angew. Chem. Int. Ed. Engl.*, 2005, **44**, 3565-3568.
10. M. Jourshabani, Z. Shariatnia, G. Achari, C. H. Langford and A. Badiei, *J. Mater. Chem. A*, 2018, **6**, 13448-13466.
11. A. Ishikawa, T. Takata, J. N. Kondo, M. Hara, H. Kobayashi and K. Domen, *J. Am. Chem. Soc.*, 2002, **124**, 13547-13553.
12. S. Gong, Z. Jiang, P. Shi, J. Fan, Q. Xu and Y. Min, *Appl. Catal. B-Environ.*, 2018, **238**, 318-327.
13. J. Yu, S. Wang, B. Cheng, Z. Lin and F. Huang, *Catal. Sci. Technol.*, 2013, **3**, 1782-1789.
14. J. Hong, Y. Wang, Y. Wang, W. Zhang and R. Xu, *ChemSusChem*, 2013, **6**, 2263-2268.
15. G. Zhang, G. Li and X. Wang, *ChemCatChem*, 2015, **7**, 2864-2870.
16. C. Li, Y. Du, D. Wang, S. Yin, W. Tu, Z. Chen, M. Kraft, G. Chen and R. Xu, *Adv. Funct. Mater.*, 2017, **27**, 1604328.
17. L. J. Fang, X. L. Wang, Y. H. Li, P. F. Liu, Y. L. Wang, H. D. Zeng and H. G. Yang, *Appl. Catal. B-Environ.*, 2017, **200**, 578-584.
18. S.-S. Yi, J.-M. Yan, B.-R. Wulan, S.-J. Li, K.-H. Liu and Q. Jiang, *Appl. Catal. B-Environ.*, 2017, **200**, 477-483.
19. Z. Qin, Y. Chen, Z. Huang, J. Su and L. Guo, *J. Mater. Chem. A*, 2017, **5**, 19025-19035.
20. J. Wen, J. Xie, R. Shen, X. Li, X. Luo, H. Zhang, A. Zhang and G. Bi, *Dalton Trans.*, 2017, **46**, 1794-1802.
21. W. Wang, T. An, G. Li, D. Xia, H. Zhao, J. C. Yu and P. K. Wong, *Appl. Catal. B-Environ.*, 2017, **217**, 570-580.
22. N. Zhao, L. Kong, Y. Dong, G. Wang, X. Wu and P. Jiang, *ACS Appl. Mater. Interf.*, 2018, **10**, 9522-9531.
23. R. Shen, J. Xie, H. Zhang, A. Zhang, X. Chen and X. Li, *ACS Sustain. Chem. Eng.*, 2018, **6**, 816-826.
24. Y. Si, Y. Zhang, L. Lu, S. Zhang, Y. Chen, J. Liu, H. Jin, S. Hou, K. Dai and W. Song, *Appl. Catal. B-Environ.*, 2018, **225**, 512-518.
25. J. Fu, C. Bie, B. Cheng, C. Jiang and J. Yu, *ACS Sustainable Chem. Eng.*, 2018, **6**, 2767-2779.
26. R. Shen, W. Liu, D. Ren, J. Xie and X. Li, *Appl. Surf. Sci.*, 2019, **466**, 393-400.
27. Y.-J. Yuan, Z. Shen, S. Wu, Y. Su, L. Pei, Z. Ji, M. Ding, W. Bai, Y. Chen, Z.-T. Yu and Z. Zou, *Appl. Catal. B-Environ.*, 2019, **246**, 120-128.
28. Q. Liu, C. Zeng, Z. Xie, L. Ai, Y. Liu, Q. Zhou, J. Jiang, H. Sun and S. Wang, *Appl. Catal. B-Environ.*, 2019, **254**, 443-451.
29. C. Zhu, Y. Wang, Z. Jiang, F. Xu, Q. Xian, C. Sun, Q. Tong, W. Zou, X. Duan and S. Wang, *Appl. Catal. B-Environ.*, 2019, **259**, 118072.
30. Y. Zhu, T. Wan, X. Wen, D. Chu and Y. Jiang, *Appl. Catal. B-Environ.*, 2019, **244**, 814-822.

31. Y. Zhu, A. Marianov, H. Xu, C. Lang and Y. Jiang, *ACS Appl. Mater. Interfaces*, 2018, **10**, 9468-9477.
32. C. Sun, H. Zhang, H. Liu, X. Zheng, W. Zou, L. Dong and L. Qi, *Appl. Catal. B-Environ.*, 2018, **235**, 66-74.
33. X. Han, D. Xu, L. An, C. Hou, Y. Li, Q. Zhang and H. Wang, *Appl. Catal. B-Environ.*, 2019, **243**, 136-144.
34. H. Sudrajat, *Mater. Res. Express*, 2018, **5**, 095501.
35. S. Chen, M. Li, S. Yang, X. Li and S. Zhang, *Appl. Surf. Sci.*, 2019, **492**, 571-578.
36. R. Shen, J. Xie, P. Guo, L. Chen, X. Chen and X. Li, *ACS Appl. Energy Mater.*, 2018, **1**, 2232-2241.
37. K. He, J. Xie, Z.Q. Liu, N. Li, X. Chen, J. Hu and X. Li, *J. Mater. Chem. A*, 2018, **6**, 13110-13122.
38. R. Shen, J. Xie, H. Zhang, A. Zhang, X. Chen and X. Li, *ACS Sustain. Chem. Eng.*, 2017, **6**, 816-826.
